# Supplementary material for: Triterpenoids in Echinoderms: Fundamental Differences in Diversity and Biosynthetic Pathways
Source: PubMed Central journal article supplement (PMC6627624; doi:10.3390/md17060352), 2019-06-13
Supplement: marinedrugs-17-00352-s001.pdf [file marinedrugs-17-00352-s001.pdf]

## Supplementary data

**Table 1.** Compiled list of echinoderm species for which the sterol content has been completely or partially described.

| Holothuroidea                  |           |                                |           |
|--------------------------------|-----------|--------------------------------|-----------|
| Species                        | Reference | Species                        | Reference |
| <i>Benthodytes lingua</i>      | [105]     | <i>Trochostoma orientale</i>   | [36]      |
| <i>Stichopus tremulus</i>      | [105]     | <i>Bathyploetes natans</i>     | [36]      |
| <i>Mesothuria verrilli</i>     | [105]     | <i>Abyssocucumis abyssorum</i> | [106]     |
| <i>Pseudostichopus trachus</i> | [36]      | <i>Oneirophanta mutabilis</i>  | [106]     |
| <i>Holothuria nobilis</i>      | [36]      | <i>Peniagone vitrea</i>        | [106]     |
| <i>Holothuria scabra</i>       | [36]      | <i>Protankyra brychia</i>      | [106]     |
| <i>Holothuria atra</i>         | [34]      | <i>Cucumaria planci</i>        | [107]     |
| <i>Cucumaria elongata</i>      | [85]      | <i>Holothuria tubulosa</i>     | [107,108] |
| <i>Cucumaria hydriani</i>      | [85]      | <i>Stichopus japonicus</i>     | [108,109] |
| <i>Cucumaria lactea</i>        | [110]     |                                |           |
| <i>Stichopus regalis</i>       | [107]     |                                |           |
| Ophiuroidea                    |           |                                |           |
| Species                        | Reference | Species                        | Reference |
| <i>Ophiacantha sp.</i>         | [106]     | <i>Ophioplocus januarii</i>    | [111]     |
| <i>Ophiura bathybia</i>        | [106]     | <i>Ophionotus victoriae</i>    | [111]     |
| <i>Ophiocomina nigra</i>       | [110]     | <i>Ophioderma longicauda</i>   | [112]     |
| <i>Ophiura albida</i>          | [85,107]  | <i>Ophiocoma wendtii</i> ,     | [111]     |

|                                      |             |                                  |           |
|--------------------------------------|-------------|----------------------------------|-----------|
| <i>Ophiocoma insularia</i>           | [34]        | <i>Ophiocoma echinata</i>        | [111]     |
| Echinoidea                           |             |                                  |           |
| Species                              | Reference   | Species                          | Reference |
| <i>Echinothrix diadema</i>           | [34]        | <i>Echinus acutus</i>            | [113]     |
| <i>Anthocidaris crassispina</i>      | [114]       | <i>Echinus esculentus</i>        | [115]     |
| <i>Astriclypeus manni</i>            | [114]       | <i>Paracentrotus lividus</i>     | [113,116] |
| <i>Echinocardium cordatum</i>        | [114]       | <i>Psammechinus miliaris</i>     | [113]     |
| <i>Temnopleurus<br/>toreumaticus</i> | [114]       | <i>Scaphechinus mirabilis</i>    | [114]     |
| Crinoidea                            |             |                                  |           |
| Species                              | Reference   | Species                          | Reference |
| <i>Antedon sp.</i>                   | [34]        | <i>Comatula sp.</i>              | [117]     |
| <i>Antedon bifida</i>                | [110]       |                                  |           |
| Asteroidea                           |             |                                  |           |
| Species                              | Reference   | Species                          | Reference |
| <i>Asterias rubens</i>               | [85,94,118] | <i>Asterias amurensis</i>        | [119-121] |
| <i>Acanthaster planci</i>            | [34]        | <i>Asterina pectinifera</i>      | [119-121] |
| <i>Ctenodiscus crispatus</i>         | [122]       | <i>Astropecten aurantiacus</i>   | [112]     |
| <i>Culcita schmideliana</i>          | [123]       | <i>Astropecten irregularis</i>   | [85]      |
| <i>Distolasterias sticantha</i>      | [120]       | <i>Astropecten polyacanthus</i>  | [119]     |
| <i>Echinaster sepositus</i>          | [112]       | <i>Astropecten scoparius</i>     | [119]     |
| <i>Henricia sanguinolenta</i>        | [85]        | <i>Certonardoa semiregularis</i> | [120,121] |

|                         |          |                                  |          |
|-------------------------|----------|----------------------------------|----------|
| <i>Leiaster leachii</i> | [86,124] | <i>Coscinasterias acutispina</i> | [86,119] |
| <i>Luidia ciliaris</i>  | [85]     | <i>Linckia multifora</i>         | [123]    |

107. Ballantine, J.; Lavis, A.; Morris, R. Marine sterols. XV. Sterols of some oceanic holothurians. *J. Exp. Mar. Biol. Ecol.* **1981**, *53*, 89–103.
108. Nomura, T.; Tsuchiya, G.; Andre, D.; Barbier, M. Sur les fractions insaponifiables des holothuries, *Stichopus japonicus* et *Holothuria tubulosa*. *Bull. Jap. Soc. Sci. Fish* **1969**, *35*, 293–298.
109. Toyama, Y.; Takagi, T. Fatty oils of aquatic invertebrates—X. Fatty oils of *Stichopus japonicus*, *Astriclypeus manni*, *Clypeaster japonicus*, and *Gorgonocephalus caryi*. *Nippon Kagaku Zasshi* **1956**, *77*, 102–105.
110. Rubinstein, I. *A Study of Marine Sterols*; University of Liverpool: Liverpool, UK, 1973.
111. Duque, C.; Rojas, J.; Zea, S.; Roccatagliata, A.J.; Maier, M.S.; Seldes, A.M. Main sterols from the ophiuroids *Ophiocoma echinata*, *Ophiocoma wendtii*, *Ophioplocus januarii* and *Ophionotus victoriae*. *Biochem. Syst. Ecol.* **1997**, *25*, 775–778.
112. Voogt, P.A. Sterols of Some Echinoids. *Arch. Int. Physiol. Biochim.* **1972**, *80*, 883–891, doi:10.3109/13813457209070439.
113. Yasuda, S. Sterol compositions of echinoids (sea urchin, sand dollar and heart urchin). *Compar. Biochem. Physiol. Part B Compar. Biochem.* **1974**, *49*, 361–366, doi:10.1016/0305-0491(74)90171-0.
114. Smith, A.G.; Goad, L.J. Sterol biosynthesis by the sea urchin *Echinus esculentus*. *Biochem. J.* **1974**, *142*, 421–427.
115. Salaque, A.; Barbier, M.; Lederer, E. Sur la biosynthèse des stérols de l’huître (*Ostrea gryphea*) et de l’oursin (*Paracentrotus lividus*). *Compar. Biochem. Physiol.* **1966**, *19*, 45–51.
116. Bolker, H.I. Crinosterol: A Unique Sterol from a Comatulid Crinoid. *Nature* **1967**, *213*, 905–906, doi:10.1038/213905a0.
117. Smith, A.G.; Rubinstein, I.; Goad, L.J. The sterols of the echinoderm *Asterias rubens*. *Biochem. J.* **1973**, *135*, 443–455, doi:10.1042/bj1350443.
118. Matsuno, T.; Nagata, S.; Mizutani, K. Sterols of Starfishes-II. *Nippon Suisan Gakkaishi* **1972**, *38*, 144–147.
119. Kobayashi, M.; Tsuru, R.; Todo, K.; Mitsushashi, H. Asteroid sterols. *Tetrahedron Lett.* **1972**, *13*, 2935–2938, doi:10.1016/S0040-4039(01)84976-5.
120. Kobayashi, M.; Mitsushashi, H. Marine sterols—IV: Structure and synthesis of amuresterol, a new marine sterol with unprecedented side chain, from *Asterias amurensis* lütken. *Tetrahedron* **1974**, *30*, 2147–2150.
121. Grossert, J.S.; Mathiapparanam, P.; Hebb, G.D.; Price, P.; Campbell, I.M. The sterols of the echinoderm, *Ctenodiscus crispatus* retzius. *Experientia* **1973**, *29*, 258–259, doi:10.1007/BF01926460.
122. Sheikh, Y.M.; Kaisin, M.; Djerassi, C. Steroids from starfish. *Steroids* **1973**, *22*, 835–850.
123. Teshima, S.-i.; Kanazawa, A. Biosynthesis of sterols in a starfish, *Leiaster leachii*. *Compar. Biochem. Physiol. Part B Compar. Biochem.* **1975**, *52*, 437–441, doi:10.1016/0305-0491(75)90158-3.
